# Supplementary material
Source: HighWire-hosted journal article supplement (https://www.highwirestage.com/highwire/filestream/77584/field_highwire_adjunct_files/0/20-00463.pdf)
Supplement: 20-00463.pdf [file 20-00463.pdf]

**On-line Table: Evolution of criteria for multiple sclerosis DIS and DIT**

| Name/Year                                                             | DIS                                                                                                                                                                                                                                                                                                                                                                                                                                                                                                                                           | DIT                                                                                                                                                                                                                                                                                                                                                                                                                                                                                                                                                                                                                                                                                                                                                                                                                                                                                                                                                                         |
|-----------------------------------------------------------------------|-----------------------------------------------------------------------------------------------------------------------------------------------------------------------------------------------------------------------------------------------------------------------------------------------------------------------------------------------------------------------------------------------------------------------------------------------------------------------------------------------------------------------------------------------|-----------------------------------------------------------------------------------------------------------------------------------------------------------------------------------------------------------------------------------------------------------------------------------------------------------------------------------------------------------------------------------------------------------------------------------------------------------------------------------------------------------------------------------------------------------------------------------------------------------------------------------------------------------------------------------------------------------------------------------------------------------------------------------------------------------------------------------------------------------------------------------------------------------------------------------------------------------------------------|
| Barkhof et al/1997 <sup>57</sup><br>McDonald et al/2001 <sup>58</sup> | Three of 4 of the following:<br>1) One gadolinium-enhancing lesion or 9 T2-hyperintense lesions if there is no gadolinium enhancing lesion<br>2) At least 1 infratentorial lesion<br>3) At least 1 juxtacortical lesion<br>4) At least 3 periventricular lesions<br>Note: One spinal cord lesion can be substituted for 1 brain lesion                                                                                                                                                                                                        | 1) If a first scan occurs $\geq 3$ months after the onset of the clinical event, the presence of a gadolinium-enhancing lesion is sufficient to demonstrate dissemination in time, provided that it is not at the site implicated in the original clinical event; if there is no enhancing lesion at this time, a follow-up scan is required; the timing of this follow-up scan is not crucial, but 3 months is recommended; a new T2- or gadolinium-enhancing lesion at this time then fulfills the criterion for dissemination in time<br>2) If the first scan is performed $< 3$ months after the onset of the clinical event, a second scan $\geq 3$ months after the clinical event showing a new gadolinium-enhancing lesion provides sufficient evidence for dissemination in time; however, if no enhancing lesion is seen at this second scan, a further scan not $< 3$ months after the first scan that shows a new T2 lesion or an enhancing lesion will suffice |
| Swanton et al/2006 <sup>59</sup>                                      | 1) Retains the 4 anatomic regions that were included in the McDonald criteria –that is, periventricular, juxtacortical, infratentorial, and spinal cord<br>2) Reduces the minimum number of lesions and regions needed for radiologic dissemination in space, i.e. at least 1 lesion in at least 2 of the 4 regions<br>3) Removes gadolinium enhancement as a feature of dissemination in space—that is, only T2 lesions and their locations are considered                                                                                   | $\geq 1$ new T2 lesion at a 3-month follow-up (a new lesion on the 3-month scan could also contribute to dissemination in space if situated in the regions specified by the criteria)                                                                                                                                                                                                                                                                                                                                                                                                                                                                                                                                                                                                                                                                                                                                                                                       |
| McDonald/2010 <sup>11</sup>                                           | At least 1 T2 lesion in at least 2 of 4 locations characteristic of MS (juxtacortical, periventricular, infratentorial, and spinal cord)<br>If the patient has a symptomatic brain stem or spinal cord syndrome, that lesion is excluded as a site for the DIS criteria                                                                                                                                                                                                                                                                       | New T2 and/or gadolinium-enhancing damage on follow-up MR imaging, compared with a baseline scan (irrespective of time since baseline); simultaneous presence of asymptomatic gadolinium-enhancing and nonenhancing lesions at any time                                                                                                                                                                                                                                                                                                                                                                                                                                                                                                                                                                                                                                                                                                                                     |
| MAGNIMS/2016 <sup>60</sup>                                            | At least 2 of 5 areas of the CNS as follows:<br>1) $\geq 3$ periventricular lesions, 2) $\geq 1$ infratentorial lesion, 3) $\geq 1$ spinal cord lesion, 4) $\geq 1$ optic nerve lesion, 5) $\geq 1$ cortical/juxtacortical lesion                                                                                                                                                                                                                                                                                                             | Simultaneous presence of both enhancing and nonenhancing MS-typical MR imaging lesions, or new T2 or enhancing MR imaging lesion compared with baseline scan (without regard for timing of baseline scan) and regardless of being symptomatic                                                                                                                                                                                                                                                                                                                                                                                                                                                                                                                                                                                                                                                                                                                               |
| McDonald/2017 <sup>1</sup>                                            | $\geq 1$ T2-hyperintense lesion ( $\geq 3$ mm in long axis), symptomatic and/or asymptomatic lesions in $\geq 2$ of the 4 following locations:<br>1) periventricular ( $\geq 1$ lesion, unless the patient is older than 50 years, in which case it is advised to seek a higher number of lesions), 2) cortical or juxtacortical, 3) infratentorial, 4) spinal cord<br>T2-hyperintense lesions of the optic nerve, such as those in a patient presenting with optic neuritis, cannot be used in fulfilling the 2017 revised McDonald criteria | Simultaneous presence of both enhancing and nonenhancing MS-typical MR imaging lesions or new T2 or enhancing MR imaging lesion compared with baseline scan (without regard to timing of baseline scan) and regardless of being symptomatic                                                                                                                                                                                                                                                                                                                                                                                                                                                                                                                                                                                                                                                                                                                                 |
